# Supplementary material for: Genomic complexity of the variable region-containing chitin-binding proteins in amphioxus
Source: PubMed Central journal article supplement (PMC2632668; doi:10.1186/1471-2156-9-78), 2008-12-01
Supplement: 1471-2156-9-78-S9.pdf [file 1471-2156-9-78-S9.pdf]

**Additional file 9.** Genomic organization of the tyrosine recombinase domain-encoding retroelement found adjacent to the VCBP2/5 gene cluster. A. The gene consists of three main open reading frames, GAG-like, RT/RH –like, and tyrosine recombinase –like, on alternate reading frames. The gene is flanked by direct repeats (rectangles); duplication of direct repeats (red) are found upstream. B. Amino acid sequence homology with a Ngaro retrotransposon from *Lytechinus variegates* (green sea urchin); separated by domain.
